# Supplementary material
Source: PubMed Central journal article supplement (PMC8892592)
Supplement: NIHMS1780166-supplement-Supplementary_Figures.pdf [file NIHMS1780166-supplement-Supplementary_Figures.pdf]

---

**Supplementary information**

---

**Adaptive optics for high-resolution  
imaging**

---

In the format provided by the  
authors and unedited

## Supplementary Information for Hampson *et al.*

### ‘Adaptive optics’

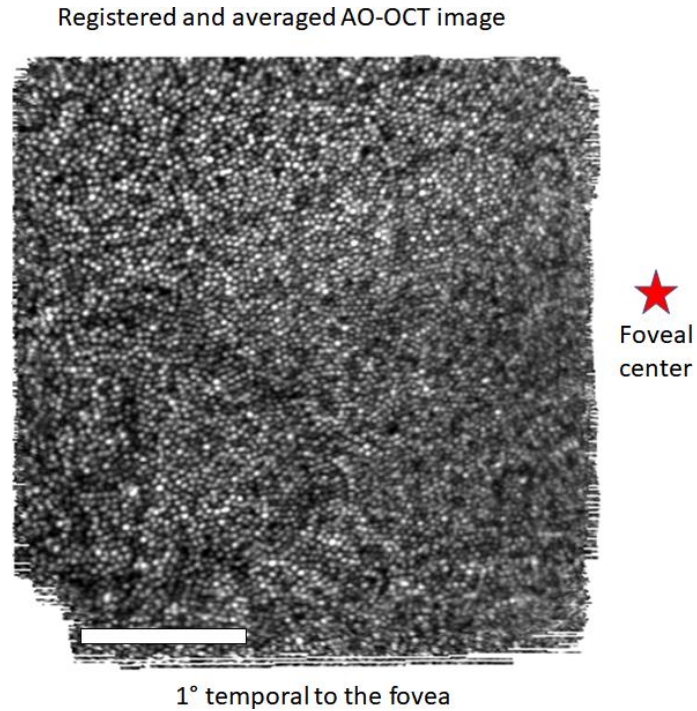

**Supplementary Figure 1.** Registering and averaging AO-OCT images improves clarity of retinal cells. Shown is a high-resolution image of the cone photoreceptor mosaic, obtained from 700 AO-corrected OCT images. Tightly packed cone cells up to 100  $\mu\text{m}$  from the foveal center are observed. Scale bar is 100  $\mu\text{m}$ .

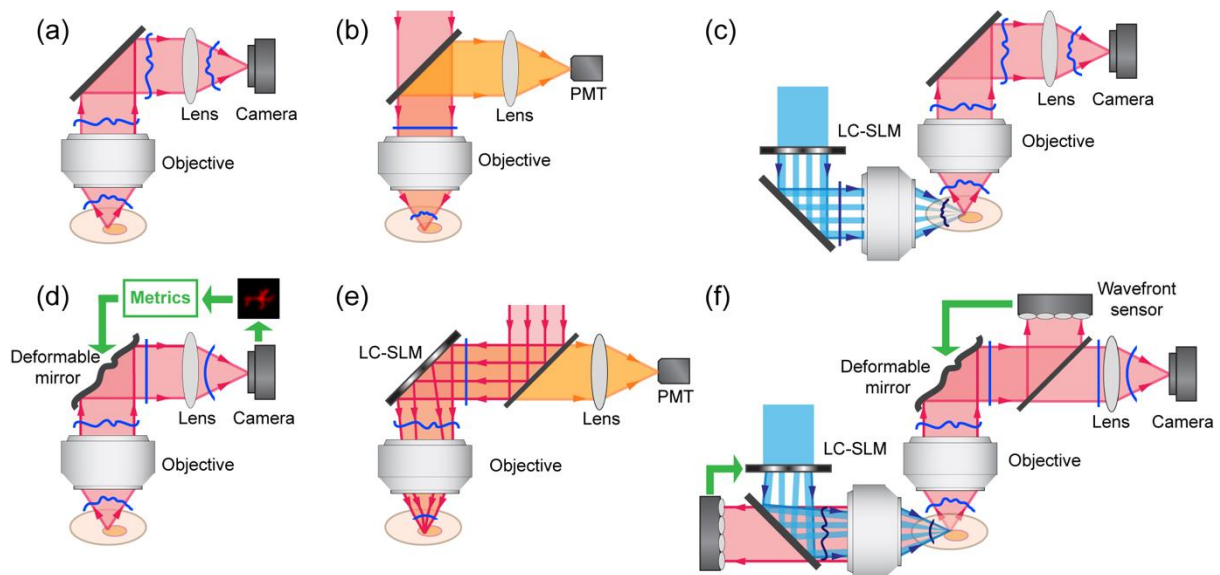

**Supplementary Figure 2.** (a-c) Wavefront aberrations in widefield (a), point-scanning (b), and light-sheet microscopy (c). PMT: photomultiplier tube. Blue and black curves: wavefronts. (d-f) Experimental implementation of AO for the results presented in Fig. 9(a-c), respectively.
